# Supplementary material for: Signs of Deregulated Gene Expression Are Present in Both CD14+ and CD14- PBMC From Non-Obese Men With Family History of T2DM
Source: Front Endocrinol (Lausanne). 2021 Feb 15;11:582732. doi: 10.3389/fendo.2020.582732 (PMC7917286; doi:10.3389/fendo.2020.582732)
Supplement: Supplementary Table 1 — List of analysed genes. For all analysed genes gene symbols, name of genes, TaqMan assay ID, median level and 75th–25th percentile range of expression (2−ΔCt), and the ratio of expression between CD14+ and CD14- PBMC are shown. Differences in expression between CD14+ and CD14- PBMC (joint data of control and FDR subjects) were evaluated by paired Multiple Wilcoxon matched pairs signed rank tests, with multiple comparisons by False Discovery Rate (method by Benjamini, Krieger, and Yekutieli). ND, not detected. Level of significance for both p and q value was set to <0.05. [file Table_1.xlsx]

## Sheet: SupplTable1
Gene symbol	Assay ID	Gene name	CD14+ 2-DCt basal	75th percentile	25th percentile	CD14- 2-DCt basal	75th percentile	25th percentile	p value	q value	CD14- /CD14+ basal expression	CD14+/CD14- basal expression	CD14+ vs. CD14- dominant expression
ABCA1	Hs01059118_m1	ATP Binding Cassette Subfamily A Member 1	0.0378915	0.110104	0.022915	0.009401	0.015673	0.00652675	2e-06	<0.000001	0.336636	2.97057
ACACA	Hs01046047_m1	acetyl-CoA carboxylase alpha	0.017319	0.0206375	0.014584	0.012103	0.01578	0.009695	0.000408	3.3e-05	0.761486	1.31322
ACADM	Hs00936584_m1	acyl-CoA dehydrogenase C4-C12	0.045079	0.051961	0.040444	0.041795	0.051017	0.039642	0.054245	0.004127	0.970053	1.03087
ACAT	Hs00608002_m1	acetyl-Coenzyme A acetyltransferase 1	0.026048	0.0396475	0.0233093	0.021873	0.027341	0.019216	0.000298	2.5e-05	0.76306	1.31051
ACLY	Hs00982738_m1	ATP citrate lyase	0.678924	0.842081	0.473043	0.468734	0.516518	0.399369	0.000552	4.5e-05	0.768156	1.30182
ACOX1	Hs01074241_m1	acyl-CoA oxidase 1, palmitoyl	ND			0.054933	0.061703	0.047387					CD14- PBMC only
AKT1	Hs00178289_m1	v-akt murine thymoma viral oncogene homolog 1	ND			ND
APOE	Hs00171168_m1	apolipoprotein E	ND			ND
ATF4	Hs00909569_g1	Activating Transcription Factor 4	1.31451	1.63991	1.1458	0.868653	1.00909	0.818296	<0.000001	<0.000001	0.671377	1.48948
ATGL	Hs00982040_g1	patatin-like phospholipase domain containing 2	0.0738275	0.0845453	0.0648225	0.019316	0.022852	0.015846	4e-06	<0.000001
ATP5O	Hs00426889_m1	ATP synthase, H+ transporting, mitochondrial F1 complex, O subunit (oligomycin sensitivity conferring protein)	0.695147	0.778879	0.537263	0.581378	0.614544	0.553125	0.118646	0.008651	0.96559	1.03564
CCL2 (MCP1)	Hs00234140_m1	chemokine (C-C motif) ligand 2	0.0099175	0.022909	0.00760525	ND							CD14+ PBMC only
CCL5	Hs00174575_m1	chemokine (C-C motif) ligand 5	0.0518655	0.35129	0.0289163	2.40051	3.39851	2.06239	8e-06	<0.000001			CD14- PBMC dominant
CCR2	Hs00356601_m1	MCP1 receptor	1.28975	1.55186	1.07936	0.161614	0.233883	0.133949	<0.000001	<0.000001	0.144796	6.90626
CD36	Hs00354519_m1	CD36 molecule (thrombospondin receptor)	2.76653	3.68418	2.43125	0.0895925	0.123839	0.060363	<0.000001	<0.000001	0.037155	26.9143	CD14+ PBMC dominant
CLIC3	Hs00362166_g1	chloride intracellular channel 3 (CLIC3)	ND			0.067102	0.0904765	0.0597315					CD14- PBMC only
COX6C	Hs00269977_m1	cytochrome c oxidase subunit VIc	ND			0.597561	0.614484	0.473678					CD14- PBMC only
CPT1A	Hs00912671_m1	carnitine palmitoyltransferase 1A (liver)	0.259302	0.36327	0.240883	0.145368	0.167445	0.116264	<0.000001	<0.000001	0.526825	1.89816
CPT1B	Hs03046298_s1	carnitine palmitoyltransferase 1B (muscle)	0.004158	0.008475	0.00190125	0.0072385	0.0111097	0.0046025	0.098411	0.007381	2.10651	0.474719
CS	Hs02574374_s1	citrate synthase	0.056594	0.0644985	0.049999	0.036709	0.040008	0.029989	6e-06	<0.000001	0.620445	1.61175
CX3CL1	Hs00171086_m1	C-X3-C Motif Chemokine Ligand 1	ND			ND
DGAT1	Hs01017541_m1	diacylglycerol O-acyltransferase 1	ND			0.006874	0.011648	0.004572					CD14- PBMC only
DGAT2	Hs01045913_m1	diacylglycerol O-acyltransferase 1	0.190662	0.260244	0.160309	0.016534	0.029227	0.009101	<0.000001	<0.000001	0.144704	6.91065
DNAJ3C	Hs00534483_m1	DnaJ (Hsp40) homolog, subfamily C, member 3	0.462451	0.550593	0.423396	0.212996	0.264334	0.171494	<0.000001	<0.000001	0.460595	2.1711
DUSP1	Hs00610256_g1	Dual Specificity Phosphatase 1	15.7639	18.7504	10.1488	1.50265	2.29844	0.81937	<0.000001	<0.000001	0.101704	9.83246
DUSP10	Hs00200527_m1	dual specificity phosphatase 10	0.0461555	0.0557583	0.0373335	0.013868	0.01711	0.010999	<0.000001	<0.000001	0.305508	3.27324
EGR1	Hs00152928_m1	early growth response 1	5.1701	9.10653	3.80889	0.096424	0.175763	0.062724	4e-06	<0.000001	0.0239273	41.7932	CD14+ PBMC dominant
EGR2	Hs00166165_m1	Early growth response proteins-2	0.238046	0.369278	0.1303	0.0043685	0.00592475	0.00251175	<0.000001	<0.000001	0.0278239	35.9404	CD14+ PBMC dominant
FASN	Hs01005622_m1	fatty acid synthase	0.0665695	0.0773853	0.0585222	0.098131	0.115053	0.086171	2e-06	<0.000001	1.49437	0.66918
FOS	Hs04194186_s1	Fos Proto-Oncogene, AP-1 Transcription Factor Subunit	0.0054995	0.00827675	0.0045755	ND							CD14+ PBMC only
GOT2	Hs00905827_g1	glutamic-oxaloacetic transaminase 2	0.0437335	0.0463267	0.038996	0.054467	0.059574	0.049004	<0.000001	<0.000001	1.27485	0.784406
GZMB	Hs00188051_m1	granzyme B (granzyme 2, cytotoxic T-CD14- PBMC-associated	ND			ND
H6PD	Hs00188728_m1	hexose-6-phosphate dehydrogenase/glucose 1-dehydrogenase	0.363158	0.397041	0.285328	0.172008	0.193209	0.151751	<0.000001	<0.000001	0.53803	1.85863
HIF1a	Hs00153153_m1	hypoxia inducible factor 1, alpha subunit (basic helix-loop-helix transcription factor)	0.812454	1.05837	0.733395	0.320748	0.35976	0.249183	<0.000001	<0.000001	0.365354	2.73707
HSPA5	Hs99999174_m1	heat shock 70kDa protein 5 (glucose-regulated protein, 78kDa)	1.02877	1.23413	0.895128	0.662682	0.803177	0.522754	<0.000001	<0.000001	0.622785	1.60569
HYOU1	Hs00197328_m1	hypoxia up-regulated 1	0.048382	0.0562122	0.0389555	0.043282	0.052764	0.033758	0.104543	0.00773	0.917275	1.09019
ICAM1	Hs00164932_m1	Intercellular Adhesion Molecule 1	0.257654	0.311022	0.230265	0.033625	0.043775	0.028822	<0.000001	<0.000001	0.136668	7.31699
IKBKB	Hs01559460_m1	Inhibitor Of Nuclear Factor Kappa B Kinase Subunit Beta	0.167894	0.191249	0.137584	0.143381	0.164164	0.109164	1e-05	<0.000001	0.819407	1.22039
IL10	Hs00961622_m1	interleukin 10	0.00154	0.00315725	0.00064975	ND							CD14+ PBMC only
IL1b	Hs01555410_m1	Interleukin 1 Beta	0.990963	1.45992	0.700544	0.028581	0.058728	0.014884	2e-06	<0.000001	0.0332877	30.0411	CD14+ PBMC dominant
IL2	Hs00174114_m1	interleukin 2	ND			ND
IL6	Hs00985639_m1	Interleukin 6	ND			0.002089	0.0029405	0.001717					CD14- PBMC only
IL8	Hs00174103_m1	interleukin 8	0.70044	1.38027	0.447909	0.101672	0.222697	0.019678	<0.000001	<0.000001	0.191828	5.21299
IRF1	Hs00971960_m1	interferon regulatory factor 1	2.51949	3.01844	2.13754	1.30254	1.51535	1.15565	<0.000001	<0.000001	0.55033	1.81709
IRF5	Hs00158114_m1	interferon regulatory factor 5	0.444519	0.50876	0.368256	0.043342	0.049161	0.034086	<0.000001	<0.000001	0.0994909	10.0512
IRS1	Hs00178563_m1	insulin receptor substrate 1	0.000976	0.001977	0.000575	0.002895	0.00397175	0.002304	5e-06	<0.000001	4.0738	0.245471
ITGB1	Hs00559595_m1	integrin, beta 1 (fibronectin receptor, beta polypeptide, antigen CD29 includes MDF2, MSK12)	0.105971	0.116173	0.095077	0.139255	0.162678	0.121821	<0.000001	<0.000001	1.34572	0.743096
ITGB2	Hs00164957_m1	integrin, beta 1 (fibronectin receptor, beta polypeptide, antigen CD29 includes MDF2, MSK12)	7.4326	7.77674	6.17698	2.17907	2.42567	1.69547	<0.000001	<0.000001	0.306078	3.26714
JUN	Hs01103582_s1	v-jun sarcoma virus 17 oncogene homolog (avian)	0.060082	0.0846963	0.0450747	0.00931	0.022198	0.006633	<0.000001	<0.000001	0.223987	4.46455
KCNQ1	Hs00923522_m1	Potassium Voltage-Gated Channel Subfamily Q Member 1	0.663215	0.762083	0.556352	0.113008	0.128147	0.091542	2e-06	<0.000001	0.17895	5.58814
KIR2DL4	Hs00427106_m1	killer cell immunoglobulin-like receptor, two domains, long cytoplasmic tail, 4	ND			0.001518	0.001765	0.0008805					CD14- PBMC only
LDHA	Hs01378790_g1	lactate dehydrogenase A	1.31007	1.43122	1.21825	0.840035	1.01594	0.793279	1e-06	<0.000001	0.679414	1.47186
MAP3K3	Hs00176747_m1	mitogen-activated protein kinase kinase kinase 3	0.196413	0.233097	0.160176	0.049478	0.057268	0.041074	<0.000001	<0.000001	0.274863	3.63818
MAPK7	Hs00611114_g1	mitogen-activated protein kinase 7	0.146268	0.157838	0.133279	0.059215	0.072379	0.052756	<0.000001	<0.000001	0.429147	2.33021
MCL1	Hs01050896_m1	Myeloid Cell Leukemia Sequence 1	5.33412	5.96475	4.91642	2.05409	2.23894	1.84668	<0.000001	<0.000001	0.399071	2.50582
MLYCD	Hs00918031_m1	malonyl-CoA decarboxylase	0.087558	0.097269	0.066484	0.075722	0.094086	0.060331	0.246749	0.017746	0.953459	1.04881
MLXIPL (ChREBP)	Hs00975714_m1	MLX interacting protein-like	ND			ND
MMP2	Hs01548727_m1	matrix metallopeptidase 2	ND			ND
MMP3	Hs00968305_m1	matrix metallopeptidase 3 (stromelysin 1, progelatinase)	ND			ND
MMP9	Hs00234579_m1	matrix metallopeptidase9	0.01106	0.017459	0.007255	0.036999	0.119878	0.0202755	9e-06	<0.000001	5.50265	0.181731
MYC	Hs00153408_m1	MYC Proto-Oncogene, BHLH Transcription Factor	0.08656	0.167731	0.057061	0.37511	0.527197	0.285553	<0.000001	<0.000001	4.19935	0.238132
NCOR1	Hs01094541_m1	Nuclear Receptor Corepressor 1	0.508535	0.539451	0.476828	0.422546	0.496706	0.385671	0.001279	0.000102	0.854693	1.17001
NRF1	Hs00192316_m1	nuclear respiratory factor 1	0.0277735	0.030837	0.0222225	0.0393	0.041792	0.036066	<0.000001	<0.000001	1.50952	0.662463
NRF2	Hs00975961_g1	nuclear factor (erythroid-derived 2)-like 2	0.136932	0.149304	0.125994	0.0544315	0.0613993	0.0517945	<0.000001	<0.000001	0.417872	2.39308
p53	Hs01034249_m1	tumor protein p53	0.331761	0.352378	0.276129	0.250704	0.278211	0.191232	2e-06	<0.000001	0.727767	1.37407
PCK2	Hs00388934_m1	phosphoenolpyruvate carboxykinase 2 (mitochondrial)	0.481021	0.554214	0.429535	0.235345	0.266156	0.195732	<0.000001	<0.000001	0.476643	2.09801
PDK4	Hs01037712_m1	pyruvate dehydrogenase kinase	0.370009	0.513205	0.275655	0.022904	0.028203	0.009136	<0.000001	<0.000001	0.0561015	17.8248
PECAM1	Hs01065282_m1	platelet/endothelial cell adhesion molecule 1	0.990812	1.1232	0.869881	0.165843	0.192654	0.126512	<0.000001	<0.000001	0.169573	5.89716
PFKL	Hs01036347_m1	Phosphofructokinase, Liver Type	0.003334	0.00502175	0.00278825	0.001716	0.0022985	0.0015805	2e-06	<0.000001	0.519035	1.92665
PLIN2 (adipophilin)	Hs00605340_m1	perilipin 2	0.0568015	0.0704822	0.0408077	0.033845	0.03985	0.021673	2e-06	<0.000001	0.607577	1.64588
PLIN3 (TIP47)	Hs00998416_m1	perilipin 3	0.578743	0.624544	0.52154	0.110099	0.117558	0.096195	<0.000001	<0.000001	0.190318	5.25438
PPARa	Hs00947539_m1	Peroxisome Proliferator Activated Receptor Alpha	0.02603	0.03308	0.017001	0.01975	0.026098	0.015398	0.017201	0.001348	0.88583	1.12889
PPARdelta	Hs04187066_g1	peroxisome proliferator-activated receptor delta	0.106666	0.125372	0.0970112	0.130263	0.14797	0.119569	5e-06	<0.000001	1.21848	0.820693
PPARg	Hs01115513_m1	Peroxisome Proliferator Activated Receptor Gamma	0.002128	0.00258975	0.0015775	ND							CD14+ PBMC only
PRF1	Hs00169473_m1	perforin 1	0.001915	0.00273275	0.0009315	2.33552	3.42798	1.58199	4e-06	<0.000001	1632	0.000612744	CD14- PBMC dominant
PTGS2 (COX2)	Hs00153133_m1	cyclooxygenase-2	0.284218	0.405825	0.184885	0.038626	0.10977	0.010502	<0.000001	<0.000001	0.245268	4.07717
RPS13	Hs01011487_g1	ribosomal protein S13	normalizator			normalizator
RUNX2	Hs00231692_m1	runt-related transcription factor 2	0.021745	0.030993	0.0149643	0.046455	0.057947	0.026439	2e-06	<0.000001	2.03224	0.492067
SCD	Hs01682761_m1	stearoyl-CoA desaturase (delta-9-desaturase)	0.006383	0.00841775	0.00515375	0.011934	0.016392	0.008378	4.1e-05	4e-06	2.18492	0.457683
SIRT1	Hs01009006_m1	sirtuin	0.0343205	0.0396885	0.030017	0.029566	0.038781	0.026617	0.019557	0.00151	0.908866	1.10027
SLC27A1	Hs01587911_m1	solute carrier family 27 member 1	0.125447	0.146721	0.106652	0.02847	0.031691	0.0218435	2e-06	<0.000001	0.218566	4.57528
SLC27A2	Hs00186324_m1	Solute Carrier Family 27 Member 2	ND			ND
SLC2A1 (GLUT1)	Hs00892681_m1	glucose transporter 1	0.008342	0.010246	0.007355	0.19821	0.235154	0.167301	<0.000001	<0.000001	23.7419	0.0421196	CD14- PBMC dominant
SLC2A4 (GLUT4)	Hs00168966_m1	glucose transporter 4	ND			ND
SOCS1	Hs00705164_s1	Suppressor Of Cytokine Signaling 1	0.0092265	0.0134267	0.00659925	0.115344	0.172239	0.086583	<0.000001	<0.000001	14.571	0.0686294
SREBP1	Hs01088691_m1	Sterol Regulatory Element Binding Transcription Factor 1	0.13525	0.152999	0.117814	0.108873	0.132927	0.093646	0.000349	2.9e-05	0.828683	1.20673
STAT1	Hs01013996_m1	Signal Transducer And Activator Of Transcription 1	1.62315	2.42165	1.27396	1.01012	1.2671	0.887637	<0.000001	<0.000001	0.618199	1.6176
TBP	Hs00427620_m1	TATA-Box Binding Protein	normalizator			normalizator
TCF7L2	Hs01009044_m1	Transcription Factor 7 Like 2	0.078441	0.102213	0.057307	0.017997	0.0226853	0.0132908	<0.000001	<0.000001	0.244933	4.08275
TGF-β1	Hs00998133_m1	Transforming Growth Factor-β1	1.66833	1.80688	1.53266	1.2363	1.32105	0.993642	1e-06	<0.000001	0.714959	1.39868
TIMP1	Hs00171558_m1	tissue inhibitor of metalloproteinase 1	0.80745	1.03842	0.523059	0.220815	0.270561	0.155483	<0.000001	<0.000001	0.314353	3.18113
TIMP2	Hs00234278_m1	tissue inhibitor of metalloproteinase 2	0.751259	0.882379	0.619923	0.037005	0.052473	0.029414	<0.000001	<0.000001	0.0650063	15.3831
TLR2	Hs00152932_m1	Toll/Interleukin-1 Receptor-Like Protein 4	0.52813	0.714445	0.447113	0.014212	0.022583	0.010488	<0.000001	<0.000001	0.0324797	30.7885	CD14+ PBMC dominant
TLR4	Hs01060206_m1	Toll Like Receptor 4	0.132539	0.217729	0.0735795	0.004961	0.008883	0.002375	<0.000001	<0.000001	0.0486228	20.5665	CD14+ PBMC dominant
TNFa	Hs00174128_m1	Tumor Necrosis Factor	0.044488	0.076952	0.024871	0.0102325	0.0141543	0.00545125	<0.000001	<0.000001	0.0486228	5.02714
VCAM1	Hs01003372_m1	Vascular Cell Adhesion Molecule 1	ND			ND
